# Supplementary material for: Recrystallization Mediates the Gelation of Amorphous Drugs: The Case of Acemetacin
Source: MDPI journal article supplement (doi:10.3390/pharmaceutics15010219), 2023-01-08
Supplement: s1 [file s1]

**Table. S1.** The gelation time of amorphous ACM under different condition. Data are mean  $\pm$  SD. (n=3, \*\*\* $p < 0.001$  vs 20°C in temperature effect experiments or vs 0.25 M in ionic strength effect experiments)

| Under different conditions |      | Gelation time (s)  |
|----------------------------|------|--------------------|
| Temperature (°C)           | 20   | 6.53 $\pm$ 0.14    |
|                            | 30   | 4.79 $\pm$ 0.09*** |
|                            | 37   | 4.03 $\pm$ 0.11*** |
|                            | 45   | 3.21 $\pm$ 0.18*** |
| pH values                  | 1.2  | 5.45 $\pm$ 0.20    |
|                            | 4.5  | —                  |
|                            | 6.8  | —                  |
|                            | 7.4  | —                  |
| Ionic strength (M)         | 0.25 | 5.73 $\pm$ 0.32    |
|                            | 0.5  | 6.31 $\pm$ 0.17    |
|                            | 0.75 | 7.84 $\pm$ 0.44*** |
|                            | 1.0  | —                  |

“—” referred to no gelation time
